# Supplementary material
Source: Research Square preprint supplement (doi:10.21203/rs.3.rs-10151610/v1)
Supplement: Supplementary file 1 [file 746f542d3975749f013a9595.docx]

**Article**: The Development of Self-Determined Vocational Readiness Among People with Mental Disabilities in Japan

**Journal**: *Discover Mental Health*

**Authors**: Yumi Yuzawa*, Takeo Kondo

*** Corresponding author’s affiliation and email**: Department of Advanced Interdisciplinary Studies, Graduate School of Engineering, The University of Tokyo;

yumiyuzawa3@gmail.com

**Supplemental Materials 2**

**Sample narratives corresponding to the concepts in Tables 3–7**

Table S3. Sample narratives for concepts mentioned frequently across all three groups

| Themes | Concepts | Sample Narratives |
| --- | --- | --- |
| Self-concept | Vague sense of inadequacy about work | “When I think about my own abilities, if I were the one doing the hiring, I definitely wouldn’t want to hire someone like me.” (Hes #16) |
| Work Image | Beliefs regarding standards for job hunting and job preparation | “Since I tend to be late, forget to report, communicate, or consult with others, and have other shortcomings, I don’t think I’m ready for a job yet.” (Con #10) |
| Full-time / Long-term employment | “I imagine working every day from morning until evening and receiving my salary at the end of the month as payment.” (Con #02) |
| Being able to fit in | “How can I fit in at a workplace? Will I be able to work harmoniously? And then, can I build truly equal relationships with others?” (Act #22) |
| My own pace | “I’d be perfectly fine with just a part-time job. I’m hoping to find disability employment position—something like three days a week for seven hours, with a 45-minute break—and make a living that way. I hope I can find something like that.” (Hes #12) |
| Meaning of Work | Independent individual | “It’s like a sense of true independence. With part-time jobs, it’s really just money for having fun, you know? ... But when it comes to full-time employment or a real job, there’s that sense of responsibility—like earning enough to support someone, or being independent, cooking every meal for myself, and things like that.” (Act #9) |
| Freedom of self-determination | “Money really is about gaining freedom. Having money gives me more freedom. I think making money is important.” (Con #18) |
| Being a useful person | “Working. It involves a sense of responsibility, and also helping those around you to make their lives easier. I think that’s what working really means.” (Con #28) |
| Being normal for my age | “It’s like, ‘Everyone my age is working and getting the things they want, so I want to do the same.’ Deep down, I guess I just wanted to imitate the people around me—or maybe catch up to them.” (Act #3) |
| Right way to live (Sense of norms) | “I mean, welfare is basically paid for by taxpayers’ money, right? When I’m on welfare, I feel kind of guilty, I guess.” (Hes #39) |
| Livelihood security | “Yeah, I guess the main reason for working is to earn an income. And I think it’s really important to be able to support myself with that income.” (Con #19) |

Table S4. Sample narratives for concepts differing between the Hesitation and Conflict Groups

| Themes | Concepts | Sample Narratives |
| --- | --- | --- |
| Self-concept | Stamina/fatigue/lack of concentration | “When I go to places like the office, it’s exhausting to spend the whole day acting like a completely different person than I usually am.” (Hes #44) |
| Inability to perform duties/tasks | “I never felt like I was actually performing my job duties. No matter where I worked, I never felt that way at all.” (Hes #12) |
| Physical improvements | “At first, my body wouldn’t move at all. But then my strength came back. So I started to feel a little more confident that I might be able to manage my daily life after all.” (Hes #42) |
| Work Image | Disconnect between past work experiences and the present | “Since I have a culinary license, the support team suggested, ‘How about a job in the kitchen?’ But honestly, cooking is a bit of a stretch for me. Given my back problems and issues with my right leg, working in a kitchen where I’d have to lift heavy things just isn’t feasible. I’ve done part-time work in the past, like in a Japanese cuisine kitchen at a hotel. I do have that kind of experience, but I think working in a large company would make interpersonal relationships more complicated. Personally, I’m more comfortable with small to medium-sized companies—places where I can work with a close-knit group of colleagues, with about seven or eight employees, or at most ten. I feel that would be a good fit for me, but I’m not sure if there are any job openings there.” (Hes #41) |
| Meaning of Work | Having others recognize my presence | “I had an experience where I lost touch with people at my workplace—after being hospitalized and such. So having children see my paintings in places like elementary schools or kindergartens is, for me, a kind of proof of my existence.” (Hes #26) |
| Self-utilization | “I’ve always been into electronics and stuff like that. I went to a technical high school. So I’m pretty good at soldering and things like that. I want to put those skills to use in a job.” (Hes #43) |

Table S5. Sample narratives for concepts mentioned frequently in the Conflict Group

| Themes | Concepts | Sample Narratives |
| --- | --- | --- |
| Self-concept | Memories of struggling helplessly | “I feel like I wasn’t really thinking about anything. I just had this ‘whatever will be, will be’ kind of attitude.” (Con #38) |
| Lack of confidence in interpersonal relationships and communication | “If I were to work, I’d inevitably have to talk to people. So I worry about whether that might lead to trouble with others. …I’m the type of person who takes a while to understand what others are saying, even when I listen to them. So I do worry about whether that might cause problems with others.” (Con #10) |

Table S6. Sample narratives for concepts differing between the Hesitation and Action Groups

| Themes | Concepts | Sample Narratives |
| --- | --- | --- |
| Work Image | Diverse work styles, workplaces, and individuals | “There are all kinds of people. And as I’ve talked to them and seen how things go—some people are doing well, while others aren’t—I’ve started to feel a little more confident about things at work too.” (Act #9) |
| Diligence and initiative | “I’ve come to realize that it’s important to talk about anything and everything without hesitation—when it comes to anything and everything. Don’t hesitate to ask questions, and don’t hesitate to take action or try new things. I believe it’s important to try to approach everything with a positive attitude.” (Act #08) |
| Commitment to reliable work and results | “I have this impression that work is something you do by being given a task and doing your best to fulfill it—I don’t think you can do it with a half-hearted attitude.” (Con #28) |
| Lack of clear work image (in the past) | “I lacked confidence, and honestly, when I first started looking for a job, everything felt so vague and confusing—I was really anxious.” (Act #07) |
| Self-concept | Stories about working in specific jobs in the past | “I was in charge of repairs and manufacturing there. So, as for the basics—well, I’m getting on in years now, so I’ve forgotten a lot of it—but back then, right after I graduated from high school, I had the technical skills required for the job. That’s how it was when I worked there.” (Hes #43) |
| Meaning of Work | Being myself | “I think of work simply as a means to achieve the ideal I envision for myself—just like doing things I like or want to try.” (Con #40) |

Table S7. Sample narratives for concepts differing between the Conflict and Action Groups

| Themes | Concepts | Sample Narratives |
| --- | --- | --- |
| Self-concept | Sense of competence in interpersonal relationships | “Like, not getting too involved with people. Once it’s over, I just say, ‘Thanks, I’m heading out,’ and leave right away. Since I started doing that, I’ve found I don’t end up bringing home any unnecessary relationships.” (Act #33) |
| Sense of experimentation | “I feel like I might be able to do it now. I’m not entirely sure yet, but I’d like to give it a try.” (Act #20) |
| Breaking free from stereotypes/ideals | “I feel like my thinking used to be really focused on what my parents thought of me... I was kind of fixated on that, but I’ve pretty much let go of that way of thinking now.” (Act #14) |
| Bodily sensory understanding of work | “I realized that this is what it’s really like to work. I was really struck by it. I don’t know how to put it, but the sense of tension is just different.” (Act #9) |
| Work Image | Envisioning personal steps | “I’m the type of person who finds it hard to be flexible or handle multitasking, so I guess I’ll just start with simple tasks backstage and gradually take on more responsibilities as I’m able to. That’s kind of how I see it.” (Act #25) |
| Perception of standards for the employment of people with disabilities | “I think there’s a rule that it has to be 20 hours, but I wish it could be a little less—like 12 hours a week, or maybe 3 or 4 hours a week.” (Act #24) |
| Meaning of Work | Meaningful time | “I’m not working right now, but I think if I did, I’d probably feel a sense of fulfillment and accomplishment.” (Con #13) |
