# Supplementary material
Source: Research Square preprint supplement (doi:10.21203/rs.3.rs-10151610/v1)
Supplement: Supplementary file 2 [file 759bae34a56b1c252debf7ac.docx]

**Article**: The Development of Self-Determined Vocational Readiness Among People with Mental Disabilities in Japan

**Journal**: *Discover Mental Health*

**Authors**: Yumi Yuzawa*, Takeo Kondo

*** Corresponding author’s affiliation and email**: Department of Advanced Interdisciplinary Studies, Graduate School of Engineering, The University of Tokyo; yumiyuzawa3@gmail.com

**Supplemental Materials 1**

**Interview guide to research Self-Determined Vocational Readiness**

1. How do you feel about work in general?

2. What is your specific image of work?

3. How do you feel about the workplace?

4. What is your specific image of your own working life?

5. How do you feel about leading such a working life?

6. How have these aspects changed?

Ask all questions from 1 to 6.

Pose follow-up questions as needed.
